# Supplementary material for: Provision of Non-English Language Services in U.S. Mental Health Facilities
Source: Atypon-hosted journal article supplement (doi:10.1176/appi.ps.202100093), 2021-07-29
Supplement: appi.ps.202100093.ds001.pdf [file appi.ps.202100093.ds001.pdf]

|                                                          |      |       |      |       |      |       |      |       |      |
|----------------------------------------------------------|------|-------|------|-------|------|-------|------|-------|------|
| Total Admits > 250/year <sup>d</sup>                     | 4543 | 38.89 | 3315 | 44.18 | 1228 | 29.39 | 0.68 | 0.409 | 1.50 |
| High Number of Specialized Services <sup>e</sup>         | 5158 | 44.15 | 3334 | 44.44 | 1824 | 43.65 | 0.65 | 0.422 | 1.02 |
| Provides Language Services                               | 8121 | 69.52 | 5186 | 69.12 | 2935 | 70.23 | 2.13 | 0.145 | 0.98 |
| Located in Ten States with Highest LEP Pop. <sup>f</sup> | 3340 | 28.59 | 2101 | 28.00 | 1239 | 29.65 | 6.46 | 0.011 | 0.94 |

<sup>a</sup>Source: National Mental Health Services Survey, 2018. "Missing data" refers to facilities with a missing response to any of the variables.

<sup>b</sup>For categorical variables facility type and ownership, the reference group is the combination of all other responses. For all other variables, the reference group was the absence or opposite of that variable.

<sup>c</sup>Some facilities received multiple sources of funding.

<sup>d</sup>For inpatient facilities, this variable refers to the number of patient admissions in the past year. For outpatient facilities, this variable refers to the number of initiations of a course of treatment in the past year.

<sup>e</sup>Facilities were considered to have a high number of services if they had more than the median (14) number of specialized services such as supportive housing, legal assistance, smoking cessation, etc. See supplement for more details.

<sup>f</sup>Source: American Community Survey 2014-2018. See supplement for more details.

Supplemental Table: Likelihood that Mental Health Facilities Offered Services in a Non-English Language, based on Facility Characteristic<sup>a</sup>

|                                      | Any Language Services |       | No Language Services |       |            |        |                 |
|--------------------------------------|-----------------------|-------|----------------------|-------|------------|--------|-----------------|
|                                      | N = 5186 (69.1%)      |       | N = 2317 (30.9%)     |       |            |        |                 |
| Characteristic                       | N                     | %     | N                    | %     | Chi-square | p      | RR <sup>b</sup> |
| <b>Facility Type</b>                 |                       |       |                      |       |            |        |                 |
| Hospital                             | 799                   | 15.41 | 153                  | 6.60  | 111.24     | <0.001 | 2.33            |
| Other                                | 9                     | 0.17  | 2                    | 0.09  | 0.34       | 0.558  | 2.01            |
| CMHC                                 | 1480                  | 28.54 | 343                  | 14.80 | 163.50     | <0.001 | 1.93            |
| Outpatient                           | 2109                  | 40.67 | 907                  | 39.15 | 1.48       | 0.224  | 1.04            |
| Multi-setting                        | 166                   | 3.20  | 105                  | 4.53  | 7.77       | 0.005  | 0.71            |
| VA                                   | 106                   | 2.04  | 93                   | 4.01  | 23.31      | <0.001 | 0.51            |
| Residential                          | 434                   | 8.37  | 586                  | 25.29 | 389.00     | <0.001 | 0.33            |
| Partial Hospitalization              | 83                    | 1.60  | 128                  | 5.52  | 88.79      | <0.001 | 0.29            |
| <b>Funding<sup>c</sup></b>           |                       |       |                      |       |            |        |                 |
| Pro-bono                             | 3018                  | 58.20 | 892                  | 38.50 | 248.19     | <0.001 | 1.51            |
| Sliding Scale                        | 3285                  | 63.34 | 1052                 | 45.40 | 210.59     | <0.001 | 1.40            |
| County/Local Funding                 | 3121                  | 60.18 | 1090                 | 47.04 | 111.72     | <0.001 | 1.28            |
| State Funding                        | 4449                  | 85.79 | 1753                 | 75.66 | 113.96     | <0.001 | 1.13            |
| Private Insurance                    | 4321                  | 83.32 | 1743                 | 75.23 | 67.16      | <0.001 | 1.11            |
| Self-pay                             | 4493                  | 86.64 | 1850                 | 79.84 | 56.01      | <0.001 | 1.09            |
| Federal Funding                      | 5071                  | 97.78 | 2153                 | 92.92 | 104.33     | <0.001 | 1.05            |
| Other                                | 47                    | 0.91  | 20                   | 0.86  | 0.00       | 0.960  | 1.05            |
| No Gov Funding                       | 41                    | 0.79  | 81                   | 3.50  | 71.59      | <0.001 | 0.23            |
| <b>Ownership</b>                     |                       |       |                      |       |            |        |                 |
| Public                               | 1045                  | 20.15 | 275                  | 11.87 | 75.19      | <0.001 | 1.70            |
| Private Non-profit                   | 3411                  | 65.77 | 1431                 | 61.76 | 11.09      | 0.001  | 1.06            |
| Private For-profit                   | 730                   | 14.08 | 611                  | 26.37 | 164.07     | <0.001 | 0.53            |
| <b>Age Groups Treated</b>            |                       |       |                      |       |            |        |                 |
| Children (<13 years)                 | 3312                  | 63.86 | 1266                 | 54.64 | 56.90      | <0.001 | 1.17            |
| Adolescents (13-17 years)            | 3521                  | 67.89 | 1467                 | 63.31 | 14.87      | <0.001 | 1.07            |
| Young Adults (18-25 years)           | 4685                  | 90.34 | 1851                 | 79.89 | 154.89     | <0.001 | 1.13            |
| Adults (26-64 years)                 | 4430                  | 85.42 | 1774                 | 76.56 | 87.16      | <0.001 | 1.12            |
| Seniors (65 years)                   | 4235                  | 81.66 | 1686                 | 72.77 | 75.63      | <0.001 | 1.12            |
| <b>Other Characteristics</b>         |                       |       |                      |       |            |        |                 |
| Total Admits > 250/year <sup>e</sup> | 2655                  | 51.20 | 660                  | 28.49 | 334.01     | <0.001 | 1.80            |

|                                                              |      |       |     |       |        |        |      |
|--------------------------------------------------------------|------|-------|-----|-------|--------|--------|------|
| Located in Top Ten States with Highest LEP Pop. <sup>f</sup> | 1640 | 31.62 | 461 | 19.90 | 108.66 | <0.001 | 1.59 |
| High Number of Specialized Services <sup>g</sup>             | 2573 | 49.61 | 761 | 32.84 | 181.74 | <0.001 | 1.51 |

<sup>a</sup>Source: National Mental Health Services Survey, 2018.

<sup>b</sup>For categorical variables facility type and ownership, the reference group is the combination of all other responses. For all other variables, the reference group was the absence or opposite of that variable.

<sup>d</sup>Some facilities received multiple sources of funding.

<sup>e</sup>For inpatient facilities, this variable refers to the number of patient admissions in the past year. For outpatient facilities, this variable refers to the number of initiations of a course of treatment in the past year.

<sup>f</sup>Source: American Community Survey 2014-2018. See supplement for more details.

<sup>g</sup>Facilities were considered to have a high number of services if they had more than the median (14) number of specialized services such as supportive housing, legal assistance, smoking cessation, etc. See supplement for more details.

Supplemental Table: Likelihood that Mental Healthcare Facilities Offered Services in a Non-English Language, based on Facility Characteristic — Multivariate Logistic Regression<sup>a,b</sup>

| Characteristic                                               | Estimate | Standard Error | Wald Z-score | Pr > Z | Adjusted Odds Ratio | 95% CI LL | 95% CI UL |
|--------------------------------------------------------------|----------|----------------|--------------|--------|---------------------|-----------|-----------|
| <b>Facility Type</b>                                         |          |                |              |        |                     |           |           |
| Residential                                                  | -0.9281  | 0.0854         | -10.8708     | <0.001 | 0.3953              | 0.3344    | 0.4673    |
| Partial Hospitalization                                      | -1.0430  | 0.1582         | -6.5919      | <0.001 | 0.3524              | 0.2584    | 0.4805    |
| VA                                                           | -1.2491  | 0.1881         | -6.6420      | <0.001 | 0.2868              | 0.1984    | 0.4146    |
| CMHC                                                         | 0.5431   | 0.0829         | 6.5493       | <0.001 | 1.7213              | 1.4631    | 2.0250    |
| Hospital                                                     | 0.7034   | 0.1061         | 6.6304       | <0.001 | 2.0207              | 1.6413    | 2.4877    |
| <b>Funding<sup>c</sup></b>                                   |          |                |              |        |                     |           |           |
| No Gov Funding                                               | -1.0716  | 0.2173         | -4.9311      | <0.001 | 0.3424              | 0.2237    | 0.5243    |
| Pro-bono                                                     | 0.4308   | 0.0615         | 7.0000       | <0.001 | 1.5385              | 1.3637    | 1.7358    |
| <b>Ownership</b>                                             |          |                |              |        |                     |           |           |
| Private For-profit                                           | -0.5918  | 0.0789         | -7.4967      | <0.001 | 0.5533              | 0.4740    | 0.6459    |
| Public                                                       | 0.4239   | 0.1007         | 4.2090       | <0.001 | 1.5280              | 1.2542    | 1.8614    |
| <b>Other Characteristics</b>                                 |          |                |              |        |                     |           |           |
| Located in Top Ten States with Highest LEP Pop. <sup>d</sup> | 0.7667   | 0.2496         | 3.0721       | 0.002  | 2.1527              | 1.3199    | 3.5110    |
| Total Admits > 250/year <sup>e</sup>                         | 0.5964   | 0.0634         | 9.4125       | <0.001 | 1.8155              | 1.6035    | 2.0556    |
| High Number of Specialized Services <sup>f</sup>             | 0.3901   | 0.0614         | 6.3559       | <0.001 | 1.4771              | 1.3097    | 1.6659    |

<sup>a</sup>Source: National Mental Health Services Survey, 2018.

<sup>b</sup>The multivariate logistic regression model used the facility's state location as the random intercept. The marginal pseudo R<sup>2</sup> was 0.22.

<sup>c</sup>Some facilities received multiple sources of funding.

<sup>d</sup>Source: American Community Survey 2014-2018. See supplement for more details.

<sup>e</sup>For inpatient facilities, this variable refers to the number of patient admissions in the past year. For outpatient facilities, this variable refers to the number of initiations of a course of treatment in the past year.

<sup>f</sup>Facilities were considered to have a high number of services if they had more than the median (14) number of specialized services such as supportive housing, legal assistance, smoking cessation, etc. See supplement for more details.

Supplemental Table: Likelihood that Mental Healthcare Facility Offered Non-English Language Services through Multilingual Staff vs. On-call Interpreter vs. Both<sup>a</sup>

| <b>Multilingual Staff (N=592, 11.4%) vs. On-call Interpreter<sup>b</sup> (N=2,532, 48.8%)</b> |                 |                       |                     |                  |                            |                  |                  |
|-----------------------------------------------------------------------------------------------|-----------------|-----------------------|---------------------|------------------|----------------------------|------------------|------------------|
| <b>Characteristic</b>                                                                         | <b>Estimate</b> | <b>Standard Error</b> | <b>Wald Z-score</b> | <b>Pr &gt; Z</b> | <b>Adjusted Odds Ratio</b> | <b>95% CI LL</b> | <b>95% CI UL</b> |
| <b>Facility Type</b>                                                                          |                 |                       |                     |                  |                            |                  |                  |
| Residential                                                                                   | -0.37           | 0.20                  | -1.83               | 0.067            | 0.69                       | 0.47             | 1.03             |
| Partial Hospitalization                                                                       | -0.90           | 0.36                  | -2.47               | 0.013            | 0.41                       | 0.20             | 0.83             |
| VA                                                                                            | -0.73           | 0.51                  | -1.42               | 0.155            | 0.48                       | 0.18             | 1.32             |
| CMHC                                                                                          | -0.26           | 0.16                  | -1.66               | 0.097            | 0.77                       | 0.56             | 1.05             |
| Hospital                                                                                      | -3.97           | 0.41                  | -9.77               | <0.001           | 0.02                       | 0.01             | 0.04             |
| <b>Funding<sup>c</sup></b>                                                                    |                 |                       |                     |                  |                            |                  |                  |
| No Gov Funding                                                                                | 1.23            | 0.50                  | 2.48                | 0.013            | 3.42                       | 1.29             | 9.03             |
| Pro-bono                                                                                      | -0.32           | 0.13                  | -2.54               | 0.011            | 0.73                       | 0.57             | 0.93             |
| <b>Ownership</b>                                                                              |                 |                       |                     |                  |                            |                  |                  |
| Private For-profit                                                                            | 1.38            | 0.17                  | 8.07                | <0.001           | 3.99                       | 2.85             | 5.58             |
| Public                                                                                        | -1.58           | 0.23                  | -6.91               | <0.001           | 0.21                       | 0.13             | 0.32             |
| <b>Other Characteristics</b>                                                                  |                 |                       |                     |                  |                            |                  |                  |
| Located in Top Ten States with Highest LEP Pop. <sup>d</sup>                                  | 2.59            | 0.45                  | 5.78                | <0.001           | 13.31                      | 5.53             | 32.04            |
| Total Admits > 250/year <sup>e</sup>                                                          | -0.09           | 0.13                  | -0.72               | 0.473            | 0.91                       | 0.71             | 1.17             |
| High Number of Specialized Services <sup>f</sup>                                              | -0.26           | 0.13                  | -2.03               | 0.043            | 0.77                       | 0.60             | 0.99             |
| <b>Multilingual Staff (N=592, 11.4%) vs. Both<sup>e</sup> (N=2,062, 39.8%)</b>                |                 |                       |                     |                  |                            |                  |                  |
| <b>Characteristic</b>                                                                         | <b>Estimate</b> | <b>Standard Error</b> | <b>Wald Z-score</b> | <b>Pr &gt; Z</b> | <b>Adjusted Odds Ratio</b> | <b>95% CI LL</b> | <b>95% CI UL</b> |
| <b>Facility Type</b>                                                                          |                 |                       |                     |                  |                            |                  |                  |
| Residential                                                                                   | -0.10           | 0.18                  | -0.56               | 0.579            | 0.91                       | 0.64             | 1.28             |
| Partial Hospitalization                                                                       | 0.28            | 0.40                  | 0.71                | 0.481            | 1.32                       | 0.61             | 2.88             |
| VA                                                                                            | 0.93            | 0.52                  | 1.77                | 0.076            | 2.53                       | 0.91             | 7.09             |
| CMHC                                                                                          | -0.32           | 0.14                  | -2.31               | 0.021            | 0.73                       | 0.55             | 0.95             |
| Hospital                                                                                      | -2.63           | 0.37                  | -7.02               | <0.001           | 0.07                       | 0.03             | 0.15             |
| <b>Funding</b>                                                                                |                 |                       |                     |                  |                            |                  |                  |
| No Gov Funding                                                                                | 1.54            | 0.45                  | 3.38                | 0.001            | 4.66                       | 1.91             | 11.37            |
| Pro-bono                                                                                      | -0.50           | 0.11                  | -4.51               | <0.001           | 0.61                       | 0.49             | 0.75             |
| <b>Ownership</b>                                                                              |                 |                       |                     |                  |                            |                  |                  |
| Private For-profit                                                                            | 0.64            | 0.15                  | 4.33                | <0.001           | 1.89                       | 1.42             | 2.52             |
| Public                                                                                        | -1.25           | 0.20                  | -6.13               | <0.001           | 0.29                       | 0.19             | 0.43             |

| <b>Other Characteristics</b>                                                      |                 |                       |                     |                  |                            |                  |                  |
|-----------------------------------------------------------------------------------|-----------------|-----------------------|---------------------|------------------|----------------------------|------------------|------------------|
| Located in Top Ten States with Highest LEP Pop.                                   | 0.54            | 0.25                  | 2.19                | 0.029            | 1.72                       | 1.06             | 2.80             |
| Total Admits > 250/year                                                           | -0.56           | 0.11                  | -5.19               | <0.001           | 0.57                       | 0.46             | 0.70             |
| High Number of Specialized Services                                               | -0.70           | 0.11                  | -6.27               | <0.001           | 0.50                       | 0.40             | 0.62             |
| <b>On-call Interpreter (N=2,532, 48.8%) vs. Both<sup>h</sup> (N=2,062, 39.8%)</b> |                 |                       |                     |                  |                            |                  |                  |
| <b>Characteristic</b>                                                             | <b>Estimate</b> | <b>Standard Error</b> | <b>Wald Z-score</b> | <b>Pr &gt; Z</b> | <b>Adjusted Odds Ratio</b> | <b>95% CI LL</b> | <b>95% CI UL</b> |
| <b>Facility Type</b>                                                              |                 |                       |                     |                  |                            |                  |                  |
| Residential                                                                       | 0.57            | 0.14                  | 3.99                | <0.001           | 1.77                       | 1.34             | 2.34             |
| Partial Hospitalization                                                           | 1.27            | 0.32                  | 3.95                | <0.001           | 3.58                       | 1.90             | 6.73             |
| VA                                                                                | 1.64            | 0.30                  | 5.42                | <0.001           | 5.16                       | 2.85             | 9.35             |
| CMHC                                                                              | 0.09            | 0.09                  | 0.98                | 0.326            | 1.10                       | 0.91             | 1.32             |
| Hospital                                                                          | 0.83            | 0.11                  | 7.71                | <0.001           | 2.29                       | 1.85             | 2.82             |
| <b>Funding</b>                                                                    |                 |                       |                     |                  |                            |                  |                  |
| No Gov Funding                                                                    | 0.22            | 0.52                  | 0.43                | 0.669            | 1.25                       | 0.45             | 3.44             |
| Pro-bono                                                                          | -0.15           | 0.08                  | -1.93               | 0.054            | 0.86                       | 0.74             | 1.00             |
| <b>Ownership</b>                                                                  |                 |                       |                     |                  |                            |                  |                  |
| Private For-profit                                                                | -0.37           | 0.12                  | -3.13               | 0.002            | 0.69                       | 0.55             | 0.87             |
| Public                                                                            | 0.05            | 0.10                  | 0.52                | 0.604            | 1.05                       | 0.87             | 1.28             |
| <b>Other Characteristics</b>                                                      |                 |                       |                     |                  |                            |                  |                  |
| Located in Top Ten States with Highest LEP Pop.                                   | -1.95           | 0.33                  | -5.82               | <0.001           | 0.14                       | 0.07             | 0.28             |
| Total Admits > 250/year                                                           | -0.48           | 0.08                  | -6.34               | <0.001           | 0.62                       | 0.54             | 0.72             |
| High Number of Specialized Services                                               | -0.41           | 0.07                  | -5.48               | <0.001           | 0.67                       | 0.58             | 0.77             |

<sup>a</sup>Source: National Mental Health Services Survey, 2018.

<sup>b</sup>The multivariate logistic regression model used the facility's state location as the random intercept. The marginal pseudo R<sup>2</sup> was 0.46.

<sup>c</sup>Some facilities received multiple sources of funding.

<sup>d</sup>Source: American Community Survey 2014-2018. See supplement for more details.

<sup>e</sup>For inpatient facilities, this variable refers to the number of patient admissions in the past year. For outpatient facilities, this variable refers to the number of initiations of a course of treatment in the past year.

<sup>f</sup>Facilities were considered to have a high number of services if they had more than the median (14) number of specialized services such as supportive housing, legal assistance, smoking cessation, etc. See supplement for more details.

<sup>g</sup>The model's marginal pseudo R<sup>2</sup> was 0.33.

<sup>h</sup>The model's marginal pseudo R<sup>2</sup> was 0.20.

Supplemental Table: Frequency of Languages Spoken by Multilingual Staff<sup>a</sup> at U.S. Mental Health Facilities

| Language spoken by staff                        | NMHSS facilities (n = 11682) |      |
|-------------------------------------------------|------------------------------|------|
|                                                 | N                            | %    |
| Spanish                                         | 3879                         | 33.2 |
| French                                          | 305                          | 2.61 |
| Russian                                         | 290                          | 2.48 |
| Any other language not listed                   | 269                          | 2.3  |
| Any Chinese language                            | 265                          | 2.27 |
| Creole                                          | 256                          | 2.19 |
| Arabic                                          | 231                          | 1.98 |
| Tagalog                                         | 220                          | 1.88 |
| Hindi                                           | 219                          | 1.87 |
| Farsi                                           | 187                          | 1.6  |
| Vietnamese                                      | 184                          | 1.58 |
| Portuguese                                      | 176                          | 1.51 |
| Korean                                          | 164                          | 1.4  |
| Hebrew                                          | 132                          | 1.13 |
| German                                          | 126                          | 1.08 |
| Polish                                          | 109                          | 0.93 |
| Italian                                         | 103                          | 0.88 |
| Hmong                                           | 88                           | 0.75 |
| Japanese                                        | 84                           | 0.72 |
| Greek                                           | 54                           | 0.46 |
| Navajo                                          | 27                           | 0.23 |
| Other American Indian or Alaska Native language | 14                           | 0.12 |
| Hopi                                            | 12                           | 0.1  |
| Ojibwa                                          | 11                           | 0.09 |
| Yupik                                           | 11                           | 0.09 |
| Lakota                                          | 10                           | 0.09 |

<sup>a</sup>The NMHSS does not include data on the frequency of languages offered by on-call interpreter services, only data on languages offered by multilingual staff.



Supplemental Table. Specialized Services Offered by U.S Mental Health Facilities from the NMHSS-2018

| <b>Service Offered</b>                                                                            | <b>No. of Facilities</b> | <b>Percent of Facilities</b> |
|---------------------------------------------------------------------------------------------------|--------------------------|------------------------------|
| Individual psychotherapy                                                                          | 6887                     | 91.79                        |
| Cognitive behavioral therapy                                                                      | 6771                     | 90.24                        |
| Group therapy                                                                                     | 6481                     | 86.38                        |
| Psychotropic medication                                                                           | 6124                     | 81.62                        |
| Trauma therapy                                                                                    | 5720                     | 76.24                        |
| Couples/family therapy                                                                            | 5396                     | 71.92                        |
| Case management services                                                                          | 5152                     | 68.67                        |
| Family psychoeducation                                                                            | 4890                     | 65.17                        |
| Behavior modification                                                                             | 4795                     | 63.91                        |
| Suicide prevention services                                                                       | 4366                     | 58.19                        |
| Integrated dual disorders treatment                                                               | 4170                     | 55.58                        |
| Dialectical behavior therapy                                                                      | 4137                     | 55.14                        |
| Screening for tobacco use                                                                         | 3861                     | 51.46                        |
| Crisis intervention team that handles acute mental health issues at this facility and/or off-site | 3659                     | 48.77                        |
| Court-ordered outpatient treatment                                                                | 3556                     | 47.39                        |
| Activity therapy                                                                                  | 3251                     | 43.33                        |
| Psychosocial rehabilitation services                                                              | 3244                     | 43.24                        |
| Smoking/tobacco cessation counseling                                                              | 2913                     | 38.82                        |
| Telemedicine/telehealth therapy                                                                   | 2394                     | 31.91                        |
| Psychiatric emergency walk-in services                                                            | 2293                     | 30.56                        |
| Education services                                                                                | 2259                     | 30.11                        |
| Diet and exercise counseling                                                                      | 2221                     | 29.60                        |
| Illness management and recovery (IMR) services                                                    | 2040                     | 27.19                        |
| Consumer-run (peer support) services                                                              | 1922                     | 25.62                        |
| Nicotine replacement therapy                                                                      | 1824                     | 24.31                        |
| Intensive case management services                                                                | 1819                     | 24.24                        |
| Integrated primary care services                                                                  | 1718                     | 22.90                        |
| Non-nicotine smoking/tobacco cessation medications (by prescription)                              | 1653                     | 22.03                        |
| Housing services                                                                                  | 1499                     | 19.98                        |
| Chronic disease/illness management services                                                       | 1350                     | 17.99                        |
| Supported employment services                                                                     | 1335                     | 17.79                        |
| Vocational rehabilitation services                                                                | 1184                     | 15.78                        |
| Supported housing programs                                                                        | 1154                     | 15.38                        |
| Assertive community treatment (ACT)                                                               | 1031                     | 13.74                        |
| Therapeutic foster care                                                                           | 383                      | 5.10                         |

|                                        |     |      |
|----------------------------------------|-----|------|
| Legal advocacy                         | 354 | 4.72 |
| Other mental health treatment approach | 289 | 3.85 |
| Electroconvulsive therapy              | 268 | 3.57 |

In our main analysis, we calculated and examined effects of the “high number of specialized services” variable for the sake of parsimony. Instead of using each support service offered as an individual predictor of language service provision, we summed up the total number of services available at each facility. The median of all 7503 facilities was 14 services offered. Facilities that offered more than the median number of services were designated as “high” number of services, which was a significant predictor of language service provision.

Supplemental Table: Limited English Households Percentage by State from the American Community Survey 2014-2018

| <b>State</b>         | <b>Total Households</b> | <b>Limited English Households</b> | <b>Percentage of Households with Limited English</b> |
|----------------------|-------------------------|-----------------------------------|------------------------------------------------------|
| California           | 12965435                | 1179753                           | 9.10%                                                |
| New York             | 7316537                 | 593391                            | 8.11%                                                |
| Texas                | 9553046                 | 753508                            | 7.89%                                                |
| New Jersey           | 3213362                 | 226180                            | 7.04%                                                |
| Florida              | 7621760                 | 524246                            | 6.88%                                                |
| Nevada               | 1075930                 | 66263                             | 6.16%                                                |
| Hawaii               | 456782                  | 27640                             | 6.05%                                                |
| Massachusetts        | 2601914                 | 152975                            | 5.88%                                                |
| Rhode Island         | 410885                  | 23316                             | 5.67%                                                |
| New Mexico           | 775651                  | 41207                             | 5.31%                                                |
| Connecticut          | 1367374                 | 71137                             | 5.20%                                                |
| Illinois             | 4830038                 | 218048                            | 4.51%                                                |
| Arizona              | 2524300                 | 107223                            | 4.25%                                                |
| Washington           | 2800423                 | 106515                            | 3.80%                                                |
| District of Columbia | 281322                  | 9951                              | 3.54%                                                |
| Maryland             | 2192518                 | 69718                             | 3.18%                                                |
| Georgia              | 3709488                 | 106906                            | 2.88%                                                |
| Colorado             | 2113387                 | 60209                             | 2.85%                                                |
| Virginia             | 3128415                 | 83239                             | 2.66%                                                |
| Nebraska             | 754063                  | 19979                             | 2.65%                                                |
| Oregon               | 1591835                 | 41346                             | 2.60%                                                |
| Kansas               | 1124549                 | 28347                             | 2.52%                                                |
| Pennsylvania         | 5025132                 | 121855                            | 2.42%                                                |
| Minnesota            | 2167801                 | 52023                             | 2.40%                                                |
| North Carolina       | 3918597                 | 92549                             | 2.36%                                                |
| Utah                 | 957619                  | 22404                             | 2.34%                                                |
| Delaware             | 357765                  | 8239                              | 2.30%                                                |
| Oklahoma             | 1474620                 | 30995                             | 2.10%                                                |
| Alaska               | 253462                  | 5294                              | 2.09%                                                |
| Idaho                | 618331                  | 12305                             | 1.99%                                                |
| Louisiana            | 1736021                 | 33362                             | 1.92%                                                |
| Iowa                 | 1256855                 | 23282                             | 1.85%                                                |
| Michigan             | 3909509                 | 68056                             | 1.74%                                                |
| Indiana              | 2553818                 | 43424                             | 1.70%                                                |

|                |         |       |       |
|----------------|---------|-------|-------|
| Arkansas       | 1152175 | 19040 | 1.65% |
| Wisconsin      | 2343129 | 36502 | 1.56% |
| Tennessee      | 2567061 | 39123 | 1.52% |
| South Carolina | 1894711 | 27892 | 1.47% |
| New Hampshire  | 528078  | 7624  | 1.44% |
| Ohio           | 4654075 | 64889 | 1.39% |
| South Dakota   | 341565  | 4630  | 1.36% |
| Kentucky       | 1728681 | 22119 | 1.28% |
| Alabama        | 1860269 | 22067 | 1.19% |
| Wyoming        | 230630  | 2695  | 1.17% |
| North Dakota   | 314903  | 3657  | 1.16% |
| Missouri       | 2396271 | 27175 | 1.13% |
| Maine          | 556955  | 5455  | 0.98% |
| Mississippi    | 1105576 | 8937  | 0.81% |
| Vermont        | 259589  | 1790  | 0.69% |
| Montana        | 423240  | 1953  | 0.46% |
| West Virginia  | 734676  | 2647  | 0.36% |

All data was sourced from the 2014-2018 American Community Survey 5-year estimate. In the main analyses, one of the predictors of language service provision examined was the facility being located in the ten states with the highest LEP percentages (CA, NY, TX, NJ, FL, NV, HI, MA, RI, and NM).
